# Supplementary material
Source: PubMed Central journal article supplement (PMC9189575)
Supplement: sj-pdf-1-ajl-10.1177_15598276211041551.pdf [file sj-pdf-1-ajl-10.1177_15598276211041551.pdf]

## Appendix A: Patient Survey Tool

This is a survey studying patient opinions about healthy eating. Please read all directions and answer as best as you can.

### DEMOGRAPHICS/HEALTH INFORMATION

---

Please fill in the bubble that best describes you, filling in the blank when necessary.

#### AGE

- 18-24
- 25-34
- 35-44
- 45-54
- 55-64
- 65-74
- 75+

#### BIOLOGICAL SEX

- Male
- Female
- Prefer not to answer

- African-American
- Asian
- Caucasian
- Hispanic
- Other (please specify)

➤ \_\_\_\_\_

#### ETHNICITY

#### HIGHEST LEVEL OF EDUCATION

- Some high school
- High school diploma or GED
- Some college, no degree
- Associate's degree
- Bachelor's degree
- Master's degree
- Doctoral degree

#### DO YOU HAVE HEALTH INSURANCE?

- No Insurance
- Public Insurance (such as Medicare, Medicaid, CHIP, etc.)
- Private Insurance (HMO's, Preferred provider organizations, etc.)
- Not sure

HEIGHT: \_\_\_\_\_ inches

WEIGHT: \_\_\_\_\_ pounds

#### HEALTH CONDITIONS **CURRENTLY** – select ANY and ALL that apply

- High blood pressure
- High cholesterol
- Diabetes
- Heart disease (such as heart failure, cardiovascular disease, heart attack, etc)
- Cancer (please specify type): \_\_\_\_\_
- None of the above conditions CURRENTLY

#### ARE YOU PRESCRIBED MEDICATIONS FOR YOUR CURRENT HEALTH CONDITIONS?

- YES (If so, how many medications are you prescribed? \_\_\_\_\_)
- NO

**HOW WOULD YOU RATE YOUR OVERALL HEALTH?**

- Very poor
- Poor
- Fair
- Good
- Very good
- Excellent

**DIET**

**PLEASE READ THE FOLLOWING DIRECTIONS**

For the purposes of this survey, **WHOLE-FOODS PLANT-BASED DIET** is one that:

**INCLUDES or EMPHASIZES whole plant foods**

- **Whole grains** – whole grain bread & pasta, brown rice
- **Fruits** – fresh, frozen, or canned
- **Vegetables** – fresh, frozen, or canned
- **Beans/legumes** – dried or canned
- **Nuts/natural nut butters**
- **Seeds**
- **Plant milk** – soy, almond, cashew, etc.
- **Soy products** – tofu, tempeh, etc.

**EXCLUDES animal products**

- **Meats** – beef, pork, lamb, etc.
- **Poultry** – chicken, turkey, duck, etc.
- **Seafood/shellfish** – fish, shrimp, etc.
- **Dairy** – cow’s milk, butter, yogurt, cream
- **Eggs**

**GREATLY REDUCES**

- **Processed or refined foods** – packaged foods and snacks, frozen meals, etc.
- **Sugars & artificial sweeteners**
- **Fats & oils**
- **Salt**

Fill in the bubble for “yes” or “no” for the following questions:

|                                                                                                                 | YES                   | NO                    |
|-----------------------------------------------------------------------------------------------------------------|-----------------------|-----------------------|
| I have heard of a whole-foods plant-based diet                                                                  | <input type="radio"/> | <input type="radio"/> |
| I know about the health benefits of a whole-foods plant-based diet                                              | <input type="radio"/> | <input type="radio"/> |
| I currently follow a whole-foods plant-based diet or a similar diet (vegan, vegetarian, semi-vegetarian)        | <input type="radio"/> | <input type="radio"/> |
| IN THE PAST I have followed a whole-foods plant-based diet or similar diet (vegan, vegetarian, semi-vegetarian) | <input type="radio"/> | <input type="radio"/> |

*If you HAVE heard of a whole-foods plant-based diet, what is your opinion of it?*

Fill in the bubble with your answer to each of the following statements.

|                                                                            | Strongly Disagree     | Disagree              | Neither Agree nor Disagree | Agree                 | Strongly Agree        |
|----------------------------------------------------------------------------|-----------------------|-----------------------|----------------------------|-----------------------|-----------------------|
| I try to follow a healthy diet                                             | <input type="radio"/> | <input type="radio"/> | <input type="radio"/>      | <input type="radio"/> | <input type="radio"/> |
| My Doctor or Dietitian/Nutritionist has told me to follow a healthier diet | <input type="radio"/> | <input type="radio"/> | <input type="radio"/>      | <input type="radio"/> | <input type="radio"/> |
| My overall health would be better if I followed a healthier diet           | <input type="radio"/> | <input type="radio"/> | <input type="radio"/>      | <input type="radio"/> | <input type="radio"/> |

### MOTIVATION

Would you try a whole foods plant-based diet for 3 weeks for any of the reasons below? Fill in one bubble for each statement.

|                                          | Definitely will NOT try for this reason | Will think about trying for this reason | Will probably try for this reason | Definitely will try for this reason | I have tried or am already trying for this reason |
|------------------------------------------|-----------------------------------------|-----------------------------------------|-----------------------------------|-------------------------------------|---------------------------------------------------|
| To lose weight                           | <input type="radio"/>                   | <input type="radio"/>                   | <input type="radio"/>             | <input type="radio"/>               | <input type="radio"/>                             |
| To lower blood pressure to normal levels | <input type="radio"/>                   | <input type="radio"/>                   | <input type="radio"/>             | <input type="radio"/>               | <input type="radio"/>                             |
| To manage or cure diabetes               | <input type="radio"/>                   | <input type="radio"/>                   | <input type="radio"/>             | <input type="radio"/>               | <input type="radio"/>                             |
| To manage or cure heart disease          | <input type="radio"/>                   | <input type="radio"/>                   | <input type="radio"/>             | <input type="radio"/>               | <input type="radio"/>                             |
| To slow down or prevent cancer           | <input type="radio"/>                   | <input type="radio"/>                   | <input type="radio"/>             | <input type="radio"/>               | <input type="radio"/>                             |
| To lower cholesterol to normal levels    | <input type="radio"/>                   | <input type="radio"/>                   | <input type="radio"/>             | <input type="radio"/>               | <input type="radio"/>                             |
| To lower my saturated fat intake         | <input type="radio"/>                   | <input type="radio"/>                   | <input type="radio"/>             | <input type="radio"/>               | <input type="radio"/>                             |
| To stop taking prescription medications  | <input type="radio"/>                   | <input type="radio"/>                   | <input type="radio"/>             | <input type="radio"/>               | <input type="radio"/>                             |
| To prevent chronic diseases              | <input type="radio"/>                   | <input type="radio"/>                   | <input type="radio"/>             | <input type="radio"/>               | <input type="radio"/>                             |

|                                                                            | Definitely not        | Probably not          | Maybe                 | Probably              | Definitely            |
|----------------------------------------------------------------------------|-----------------------|-----------------------|-----------------------|-----------------------|-----------------------|
| Would you be willing to try a whole-foods plant based diet for ANY reason? | <input type="radio"/> |

**What OTHER THINGS would help motivate you to try a whole-foods plant-based diet for 3 weeks?**

---

**BARRIERS**

What would **HOLD YOU BACK** from trying a whole-foods plant-based diet for 3 weeks? Fill in one bubble for each statement.

|                                                            | Strongly Disagree | Disagree | Neither Agree or Disagree | Agree | Strongly Agree | Does Not Apply |
|------------------------------------------------------------|-------------------|----------|---------------------------|-------|----------------|----------------|
| I do not like vegetables                                   | ○                 | ○        | ○                         | ○     | ○              | ○              |
| I do not want to change my diet                            | ○                 | ○        | ○                         | ○     | ○              | ○              |
| I do not want to try new foods                             | ○                 | ○        | ○                         | ○     | ○              | ○              |
| I do not have enough will power                            | ○                 | ○        | ○                         | ○     | ○              | ○              |
| I would not get enough to eat                              | ○                 | ○        | ○                         | ○     | ○              | ○              |
| I would not get enough iron                                | ○                 | ○        | ○                         | ○     | ○              | ○              |
| I would not get enough protein                             | ○                 | ○        | ○                         | ○     | ○              | ○              |
| I would not get enough calcium                             | ○                 | ○        | ○                         | ○     | ○              | ○              |
| I would not know what to buy at the grocery store          | ○                 | ○        | ○                         | ○     | ○              | ○              |
| I would not know what to cook                              | ○                 | ○        | ○                         | ○     | ○              | ○              |
| I would not know what to order at restaurants              | ○                 | ○        | ○                         | ○     | ○              | ○              |
| I do not have enough time                                  | ○                 | ○        | ○                         | ○     | ○              | ○              |
| My family or partner would not eat this way                | ○                 | ○        | ○                         | ○     | ○              | ○              |
| I do not have access to a grocery store with fresh produce | ○                 | ○        | ○                         | ○     | ○              | ○              |
| I would miss eating meat                                   | ○                 | ○        | ○                         | ○     | ○              | ○              |
| I would miss eating cheese/dairy                           | ○                 | ○        | ○                         | ○     | ○              | ○              |
| I would miss eating eggs                                   | ○                 | ○        | ○                         | ○     | ○              | ○              |
| I would miss going out to eat                              | ○                 | ○        | ○                         | ○     | ○              | ○              |
| It would be too expensive                                  | ○                 | ○        | ○                         | ○     | ○              | ○              |

*Do you have other reasons for NOT wanting to try a whole- foods plant-based diet for 3 weeks?*

**ADDITIONAL INFORMATION**

---

What would HELP YOU try a whole-foods plant-based diet for 3 weeks? Fill in one bubble for each statement.

|                                                             | Strongly Disagree | Disagree | Not Sure | Agree | Strongly Agree |
|-------------------------------------------------------------|-------------------|----------|----------|-------|----------------|
| Being told by my Doctor to do it                            | ○                 | ○        | ○        | ○     | ○              |
| Being told by a Dietitian/Nutritionist to do it             | ○                 | ○        | ○        | ○     | ○              |
| Attending classes on whole-food plant-based nutrition       | ○                 | ○        | ○        | ○     | ○              |
| Attending a whole-food plant-based cooking class            | ○                 | ○        | ○        | ○     | ○              |
| Doing my own research on whole-food plant-based nutrition   | ○                 | ○        | ○        | ○     | ○              |
| Seeing that a whole-foods plant-based diet works for others | ○                 | ○        | ○        | ○     | ○              |
| Getting a detailed meal plan                                | ○                 | ○        | ○        | ○     | ○              |
| Getting more information or evidence                        | ○                 | ○        | ○        | ○     | ○              |

*If you agreed with, "Getting more information or evidence," what kind of information or evidence do you need?*

*What source of nutrition information do you think is the MOST TRUSTWORTHY (such as websites, doctors, dietitians, nutritionists, trainers, magazines, the news, etc.)?*

**Additional comments?**

**THANK YOU FOR TAKING THE TIME TO COMPLETE THIS SURVEY**

**Appendix B: Student/Resident Survey Tool**

The following is a survey to assess MEDICAL STUDENT or RESIDENT perceptions and opinions about healthy eating. Please read all directions and answer to the best of your abilities.

**DEMOGRAPHICS/HEALTH INFORMATION**

Please bubble in the answer that best describes you, filling in the blank when necessary.

**YEAR**

- M1
- M2
- M3
- M4
- Resident year 1
- Resident year 2
- Resident year 3

**BIOLOGICAL SEX**

- Male
- Female
- Prefer not to answer

**AREAS OF INTEREST – select ALL that apply**

- Allergy/Immunology
- Anesthesiology
- Cardiology
- Critical Care
- Dermatology
- Emergency Medicine
- Endocrinology
- Family Medicine
- Gastroenterology
- Genetics
- Hematology
- Infectious Disease
- Internal Medicine
- Nephrology
- Neurology
- Obstetrics and Gynecology
- Oncology
- Ophthalmology
- Orthopedics
- Otolaryngology
- Pain Management
- Pediatrics
- Physical Medicine and Rehabilitation
- Preventive Medicine
- Psychiatry

- o Pulmonology
- o Radiation Oncology
- o Rheumatology
- o Sports Medicine
- o Surgery
- o Urology
- o Other not listed: \_\_\_\_\_

## DIET

**PLEASE READ THE FOLLOWING DIRECTIONS:** For the purposes of this survey, a **WHOLE-FOODS, PLANT-BASED DIET** is one that:

### INCLUDES or EMPHASIZES whole plant foods

- **Whole grains** – whole grain bread & pasta, brown rice
- **Fruits** – fresh, frozen, or canned
- **Vegetables** – fresh, frozen, or canned
- **Beans/legumes** – dried, or canned
- **Nuts/natural nut butters**
- **Seeds**
- **Plant milk** – soy, almond, cashew, etc.
- **Soy products** – tofu, tempeh, etc.

### EXCLUDES animal products

- **Meats** – beef, pork, lamb, etc.
- **Poultry** – chicken, turkey, duck, etc.
- **Seafood/shellfish** – fish, shrimp, etc.
- **Dairy** – cow’s milk, butter, yogurt, cream
- **Eggs**

### GREATLY REDUCES

- **Processed or refined foods** – packaged foods and snacks, frozen meals, etc.
- **Sugars & artificial sweeteners**
- **Fats & oils**
- **Salt**

Mark “yes” or “no” for the following questions:

|                                                                                                       | YES | NO |
|-------------------------------------------------------------------------------------------------------|-----|----|
| I am familiar with or have heard of a whole-foods, plant-based diet                                   | 0   | 0  |
| I am familiar with the health benefits of a whole-foods, plant-based diet                             | 0   | 0  |
| I currently follow a whole-foods, plant-based diet, or variation (vegan, vegetarian, semi-vegetarian) | 0   | 0  |
| I have followed a whole-foods, plant-based diet in                                                    | 0   | 0  |

the past, or variation (vegan, vegetarian, semi-vegetarian, etc.)

Mark whether you strongly disagree, disagree, agree, strongly agree, or are neutral regarding the following statements.

|                                                                            | Strongly Disagree     | Disagree              | Neither Agree nor Disagree | Agree                 | Strongly Agree        |
|----------------------------------------------------------------------------|-----------------------|-----------------------|----------------------------|-----------------------|-----------------------|
| I try to follow a healthy diet                                             | <input type="radio"/> | <input type="radio"/> | <input type="radio"/>      | <input type="radio"/> | <input type="radio"/> |
| My doctor or Dietitian/Nutritionist has told me to follow a healthier diet | <input type="radio"/> | <input type="radio"/> | <input type="radio"/>      | <input type="radio"/> | <input type="radio"/> |
| My overall health would be better if I followed a healthier diet           | <input type="radio"/> | <input type="radio"/> | <input type="radio"/>      | <input type="radio"/> | <input type="radio"/> |

If you have heard of a whole-foods, plant-based diet, comment on your current attitudes/beliefs toward it:

---



---

### RECOMMENDATION

Given that each of the statements below is supported with scientific evidence with regards to a whole-foods, plant-based diet, **how likely would you be to RECOMMEND a whole-foods, plant-based diet TO YOUR PATIENTS for at least 3 weeks** for each of the statements given?

|                                          | Definitely will NOT recommend for this reason | Might recommend to CERTAIN patients for this reason | Would probably recommend to MOST patients for this reason | Definitely WOULD recommend for this reason | I am ALREADY recommending or planning to recommend to patients for this reason |
|------------------------------------------|-----------------------------------------------|-----------------------------------------------------|-----------------------------------------------------------|--------------------------------------------|--------------------------------------------------------------------------------|
| To lose weight                           | <input type="radio"/>                         | <input type="radio"/>                               | <input type="radio"/>                                     | <input type="radio"/>                      | <input type="radio"/>                                                          |
| To lower blood pressure to normal levels | <input type="radio"/>                         | <input type="radio"/>                               | <input type="radio"/>                                     | <input type="radio"/>                      | <input type="radio"/>                                                          |
| To manage or cure diabetes               | <input type="radio"/>                         | <input type="radio"/>                               | <input type="radio"/>                                     | <input type="radio"/>                      | <input type="radio"/>                                                          |
| To manage or cure heart disease          | <input type="radio"/>                         | <input type="radio"/>                               | <input type="radio"/>                                     | <input type="radio"/>                      | <input type="radio"/>                                                          |
| To slow down/prevent cancer              | <input type="radio"/>                         | <input type="radio"/>                               | <input type="radio"/>                                     | <input type="radio"/>                      | <input type="radio"/>                                                          |



|                                       |                       |                       |                       |                       |                       |
|---------------------------------------|-----------------------|-----------------------|-----------------------|-----------------------|-----------------------|
| To lower cholesterol to normal levels | <input type="radio"/> |
| To lower saturated fat intake         | <input type="radio"/> |
| To go off of prescription medications | <input type="radio"/> |
| To prevent chronic diseases           | <input type="radio"/> |

Answer the following question:

|                                                                                                    | Extremely unlikely    | Moderately unlikely   | Neither likely nor unlikely | Moderately likely     | Extremely likely      |
|----------------------------------------------------------------------------------------------------|-----------------------|-----------------------|-----------------------------|-----------------------|-----------------------|
| How likely would you be to recommend a whole-foods, plant-based diet for ANY of the above reasons? | <input type="radio"/> | <input type="radio"/> | <input type="radio"/>       | <input type="radio"/> | <input type="radio"/> |

*What OTHER REASONS would motivate you to recommend a whole-foods, plant-based diet to patients?*

---



---

### BARRIERS

When considering RECOMMENDING a whole-foods, plant-based diet TO YOUR PATIENTS for at least 3 weeks, which factors would prevent this or get in your way? In other words, **what are the reasons you might NOT recommend a whole-foods, plant-based diet to your patients?**

|                                                    | Strongly Disagree     | Disagree              | Not Sure or Not Applicable | Agree                 | Strongly Agree        |
|----------------------------------------------------|-----------------------|-----------------------|----------------------------|-----------------------|-----------------------|
| They do not like vegetables                        | <input type="radio"/> | <input type="radio"/> | <input type="radio"/>      | <input type="radio"/> | <input type="radio"/> |
| They will not want to change their diets/lifestyle | <input type="radio"/> | <input type="radio"/> | <input type="radio"/>      | <input type="radio"/> | <input type="radio"/> |
| They will not want to try new foods                | <input type="radio"/> | <input type="radio"/> | <input type="radio"/>      | <input type="radio"/> | <input type="radio"/> |
| They will not have enough will power               | <input type="radio"/> | <input type="radio"/> | <input type="radio"/>      | <input type="radio"/> | <input type="radio"/> |
| They would not get enough to eat                   | <input type="radio"/> | <input type="radio"/> | <input type="radio"/>      | <input type="radio"/> | <input type="radio"/> |
| They would not                                     | <input type="radio"/> | <input type="radio"/> | <input type="radio"/>      | <input type="radio"/> | <input type="radio"/> |

|                                                                      |   |   |   |   |   |
|----------------------------------------------------------------------|---|---|---|---|---|
| get enough iron                                                      |   |   |   |   |   |
| They would not get enough protein                                    | 0 | 0 | 0 | 0 | 0 |
| They would not get enough calcium                                    | 0 | 0 | 0 | 0 | 0 |
| They would not know what to buy at the grocery store                 | 0 | 0 | 0 | 0 | 0 |
| They would not know what to cook                                     | 0 | 0 | 0 | 0 | 0 |
| They would not know what to order at restaurants                     | 0 | 0 | 0 | 0 | 0 |
| They would not have enough time                                      | 0 | 0 | 0 | 0 | 0 |
| Their household would not eat plant-based foods                      | 0 | 0 | 0 | 0 | 0 |
| They do not have access to a grocery store with a variety of produce | 0 | 0 | 0 | 0 | 0 |
| It would give them indigestion, gas, and/or stomach upset            | 0 | 0 | 0 | 0 | 0 |
| They would miss eating meat                                          | 0 | 0 | 0 | 0 | 0 |
| They would miss eating cheese/dairy                                  | 0 | 0 | 0 | 0 | 0 |
| They would miss eating eggs                                          | 0 | 0 | 0 | 0 | 0 |
| They would miss going out to eat                                     | 0 | 0 | 0 | 0 | 0 |
| It would be too expensive                                            | 0 | 0 | 0 | 0 | 0 |

***If you have any other reasons for not wanting to recommend a whole-foods, plant-based diet or comments about reasons listed above, please include them here:***

---



---

## CURRICULUM

If you are NOT WILLING TO RECOMMEND a whole-foods, plant-based diet to your patients for at least 3 weeks for ANY reason, **which of the following factors might help change your mind?**

|                                                                                                                       | Strongly Disagree | Disagree | Not Sure | Agree | Strongly Agree |
|-----------------------------------------------------------------------------------------------------------------------|-------------------|----------|----------|-------|----------------|
| Attending a whole-foods, plant-based nutrition elective in medical school                                             | ○                 | ○        | ○        | ○     | ○              |
| Incorporating more whole-foods, plant-based nutrition into current medical school classes                             | ○                 | ○        | ○        | ○     | ○              |
| If more focus were put on whole-foods, plant-based nutrition on national board or shelf examinations                  | ○                 | ○        | ○        | ○     | ○              |
| Attending a whole-foods, plant-based cooking class as an elective in medical school                                   | ○                 | ○        | ○        | ○     | ○              |
| Adding whole-foods, plant-based nutrition competencies to internal medicine or family medicine residency requirements | ○                 | ○        | ○        | ○     | ○              |
| Adding whole-foods, plant-based nutrition competencies to cardiology licensure requirements                           | ○                 | ○        | ○        | ○     | ○              |
| Doing my own research on whole-foods, plant-based nutrition                                                           | ○                 | ○        | ○        | ○     | ○              |
| Seeing that a whole-foods, plant-based diet works for others in clinical practice                                     | ○                 | ○        | ○        | ○     | ○              |
| Seeing a nutritionally-complete and detailed meal plan                                                                | ○                 | ○        | ○        | ○     | ○              |
| Getting more information or evidence in general                                                                       | ○                 | ○        | ○        | ○     | ○              |

*If you agreed to the statement, "Getting more information or evidence in general," what kind of information or evidence in specific are you interested in?*

---

*Do you have any other suggestions or ideas related to general nutrition education in medical school?*

---

---

How much do you agree with the following statements?

|                                                                                                | Strongly Disagree | Disagree | Neither Agree nor Disagree | Agree | Strongly Agree | Not Applicable |
|------------------------------------------------------------------------------------------------|-------------------|----------|----------------------------|-------|----------------|----------------|
| I received/am receiving enough nutrition education in my medical school training               | 0                 | 0        | 0                          | 0     | 0              | 0              |
| I received/am receiving enough nutrition education in my residency training                    | 0                 | 0        | 0                          | 0     | 0              | 0              |
| More focus should be put on PLANT- BASED nutrition in medical school and/or residency programs | 0                 | 0        | 0                          | 0     | 0              | 0              |

*Do you have any other comments or ideas about teaching whole-foods, plant-based nutrition to medical students?*

---

---
